# Supplementary material
Source: MDPI journal article supplement (https://www.mdpi.com/1424-8247/16/3/360)
Supplement: s1 [file s1]

**Table S1.** The observed and predicted mean PK parameters and the ratios of predicted to observed values by the final clarithromycin PBPK model

| Parameters                                                          | Observed<br>(n = 17) | Predicted<br>(n = 100) | Ratio<br>(predicted/observed) |
|---------------------------------------------------------------------|----------------------|------------------------|-------------------------------|
| <i>Single 250 mg oral dose [20]</i>                                 |                      |                        |                               |
| AUC <sub>0-inf</sub> (mg×h/L)                                       | 4.36 (1.51)          | 3.97 (1.97)            | 0.91 (0.36–1.46)              |
| C <sub>max</sub> (mg/L)                                             | 0.78 (0.25)          | 0.71 (0.26)            | 0.91 (0.47–1.35)              |
| T <sub>max</sub> (h)                                                | 1.8 (0.7)            | 1.97 (0.27)            | -                             |
| CL (L/h)                                                            | 58.14 (16.8)         | 70.24 (33.01)          | 1.21 (0.54–1.87)              |
| <i>Multiple doses of 250 mg, every 12 hours for seven dose [20]</i> |                      |                        |                               |
| AUC <sub>τ</sub> (mg×h/L)                                           | 6.86 (2.09)          | 7.72 (5.33)            | 1.13 (0.28–1.97)              |
| C <sub>max</sub> (mg/L)                                             | 1.14 (0.32)          | 1.15 (0.56)            | 1.01 (0.44–1.58)              |
| T <sub>max</sub> (h)                                                | 2.0 (1.1)            | 2.09 (0.30)            | -                             |
| CL (L/h)                                                            | 39.48 (11.16)        | 46.66 (37.74)          | 1.18 (0.17–2.19)              |

Observed and predicted PK parameters are presented as the arithmetic mean (SD); AUC<sub>0-inf</sub>: area under the curve from zero to time infinity; AUC<sub>τ</sub>: area under the plasma concentration-time curve during a dosing interval at steady state; C<sub>max</sub>: the maximum concentration; T<sub>max</sub>: the time of maximum drug concentration.

**Table S2.** The observed and predicted pharmacokinetic parameters and their mean ratios of amoxicillin by the final amoxicillin model.

| Parameters                                                                  | Observed          | Predicted<br>(n = 100) | Ratio<br>(predicted/observed) |
|-----------------------------------------------------------------------------|-------------------|------------------------|-------------------------------|
| <i>A Single 875 mg oral dose (n = 10) [21]</i>                              |                   |                        |                               |
| AUC <sub>0-inf</sub> (ng×h/mL)                                              | 34180.0 (12940.0) | 28378.0 (6760.2)       | 0.83 (0.46–1.20)              |
| C <sub>max</sub> (ng/mL)                                                    | 12120.0 (4060.0)  | 10184.1 (2695.2)       | 0.84 (0.48–1.20)              |
| T <sub>max</sub> (h)                                                        | 1.5 [1.0–3.0]     | 1.2 [0.7–2.0]          | –                             |
| CL (L/h)                                                                    | 29.1 (11.0)       | 32.7 (8.2)             | 1.12 (0.61–1.63)              |
| <i>A multiple oral dose of 1000 mg twice daily for 6 days (n = 15) [22]</i> |                   |                        |                               |
| AUC <sub>τ</sub> (ng×h/mL)                                                  | 27900.0 (8400.0)  | 32475.5 (7756.7)       | 1.16 (0.72–1.61)              |
| C <sub>max</sub> (ng/mL)                                                    | 9370.0 (2090.0)   | 11648.8 (3075.1)       | 1.24 (0.81–1.67)              |
| T <sub>max</sub> (h)                                                        | 1.5 [0.8–2.5]     | 1.2 [0.7–2.0]          | –                             |
| CL (L/h)                                                                    | 38.6 (13.2)       | 32.6 (8.2)             | 0.85 (0.49–1.20)              |
| <i>Multiple oral doses of 1000 mg twice daily for 5 days (n = 20) [11]</i>  |                   |                        |                               |
| AUC <sub>τ</sub> (ng×h/mL)                                                  | 32594.5           | 31519.3                | 0.97                          |
| C <sub>max</sub> (ng/mL)                                                    | 9476.9            | 11250.6                | 1.19                          |
| T <sub>max</sub> (h)                                                        | 2.0 [1.0–4.0]     | 1.2 [0.7–2.0]          | –                             |
| CL (L/h)                                                                    | 31.2              | 32.7                   | 1.05                          |

Observed and predicted PK parameters are presented as mean (SD), except for T<sub>max</sub> : median [min–max]

for a single 875 mg oral dose;  $AUC_{0-\infty}$ : area under the curve from zero to time infinity;  $AUC_{\tau}$ : area under the plasma concentration-time curve during a dosing interval at steady state;  $C_{\max}$ : the maximum concentration; CL: clearance.

**Table S3.** The Lua script for baseline intragastric pH model

```

function popSimSetup(...)

    sc:setNUserOdes(1)

end

function compoundSetup(...)

    sc:setIIVDistribution(1, sc.TRUNCATED_NORMAL_CV, -0.236, 0)  -- a1
    sc:setIIVDistribution(2, sc.TRUNCATED_NORMAL_CV, 0.05303, 0)  -- b1
    sc:setIIVDistribution(3, sc.TRUNCATED_NORMAL_CV, -0.5106, 0)  -- a2
    sc:setIIVDistribution(4, sc.TRUNCATED_NORMAL_CV, -0.1866, 0)  -- b2
    sc:setIIVDistribution(5, sc.TRUNCATED_NORMAL_CV, -0.1753, 0)  -- a3
    sc:setIIVDistribution(6, sc.TRUNCATED_NORMAL_CV, 0.4165, 0)  -- b3
    sc:setIIVDistribution(7, sc.TRUNCATED_NORMAL_CV, -0.3828, 0)  -- a4
    sc:setIIVDistribution(8, sc.TRUNCATED_NORMAL_CV, 0.01066, 0)  -- b4
    sc:setIIVDistribution(9, sc.TRUNCATED_NORMAL_CV, 0.359, 0)  -- a5
    sc:setIIVDistribution(10, sc.TRUNCATED_NORMAL_CV, -0.08818, 0)  -- b5
    sc:setIIVDistribution(11, sc.TRUNCATED_NORMAL_CV, 0.1388, 0)  -- a6
    sc:setIIVDistribution(12, sc.TRUNCATED_NORMAL_CV, 0.4256, 0)  -- b6
    sc:setIIVDistribution(13, sc.TRUNCATED_NORMAL_CV, 0.2392, 0)  -- w
    sc:setIIVDistribution(14, sc.TRUNCATED_NORMAL_CV, 1.697, 0)  -- a0

end

function individualCompoundSetup(...)

    for i=1,14 do

        local P_indi = sc:sampleIIVDistribution(i)

        sc:setParameter(i,P_indi)

    end

end

function odeRateStep(t, xin, su, gu, P, ...)

    local a1, b1, a2, b2, a3, b3, a4, b4, a5, b5, a6, b6, w, a0

    a1    = P[1]

```

```

b1  = P[2]

a2  = P[3]

b2  = P[4]

a3  = P[5]

b3  = P[6]

a4  = P[7]

b4  = P[8]

a5  = P[9]

b5  = P[10]

a6  = P[11]

b6  = P[12]

w   = P[13]

a0  = P[14]


SUR = a0 + (a1*math.cos(t*w) + b1*math.sin(t*w)) + (a2*math.cos(2*t*w) + b2*math.sin(2*t*w)) +
(a3*math.cos(3*t*w) + b3*math.sin(3*t*w)) + (a4*math.cos(4*t*w) + b4*math.sin(4*t*w)) +
(a5*math.cos(5*t*w) + b5*math.sin(5*t*w)) + (a6*math.cos(6*t*w) + b6*math.sin(6*t*w))

xout = xin + SUR

return xout

end

```

**Table S4.** The Lua script for indirect response model

```
function popSimSetup(...)
    sc:setNUserOdes(1)
end
function compoundSetup(...)
    sc:setIIVDistribution(1, sc.TRUNCATED_NORMAL_CV, 0.71, 30)
    sc:setIIVDistribution(2, sc.TRUNCATED_NORMAL_CV, 1.32, 30)
end
function individualCompoundSetup(...)
    for i=1,7 do
        local P_indi = sc:sampleIIVDistribution(i)
        sc:setParameter(i,P_indi)
    end
end
function odeInitStep(xin, su, P, ...)
    local kin, kout
    kin = P[1]
    kout = P[2]
    su[1] = 1.5
    return su[1]
end
function odeRateStep(t, xin, su, gu, P, ...)
    local kin, kout
    kin = P[1]
    kout = P[2]
    gu[1] = kin * xin - kout * su[1]
    if su[1] > 14 then
        su[1] = 14
    elseif su[1] < 1 then
        su[1] = 1
    end
    return su[1], sc:feedbackIndivStomachpH(su[1])
end
```
